# Supplementary material
Source: PubMed Central journal article supplement (PMC3428884)
Supplement: NIHMS37946-supplement-01.pdf [file NIHMS37946-supplement-01.pdf]

**Electronic Supporting Material – Veena et al.**

**ESM Table 1. Description of the cognitive tests used in the study**

| <b>Tests from KABC<sup>a</sup>-II</b>          |                                                                                                                                                                                                                               |                                                                                                                                         |
|------------------------------------------------|-------------------------------------------------------------------------------------------------------------------------------------------------------------------------------------------------------------------------------|-----------------------------------------------------------------------------------------------------------------------------------------|
| Name of the test                               | Description                                                                                                                                                                                                                   | Cognitive abilities                                                                                                                     |
| Atlantis                                       | The child is taught nonsense names for fish, plants and shells and is asked to point to the named object among an array of pictures                                                                                           | Learning ability/long-term storage and retrieval, associative memory                                                                    |
| Word order                                     | The child points to a series of silhouettes of common objects in the same order as mentioned by the examiner; an interference task (color naming) is added between the stimulus and the response for the more difficult items | Memory span, short term memory, working memory                                                                                          |
| Pattern Reasoning                              | The child completes a pattern by selecting the correct image from a set of 4 to 6 options shown; most stimuli are abstract, geometric shapes and the difficulty of the task increases as the test progresses.                 | Reasoning abilities such as induction and deduction and fluid reasoning                                                                 |
| <b>Additional tests</b>                        |                                                                                                                                                                                                                               |                                                                                                                                         |
| Verbal fluency<br>a) Animals<br>b) First names | The child is asked to name as many animals as possible in 1 minute and then asked to name as many first names as possible in 1 minute.                                                                                        | Broad retrieval ability; speed and flexibility of verbal thought process; neuropsychological test of language production                |
| Kohs block Design                              | A psychometric test in which the child arranges groups of 4, 9, or 16 multi-colored blocks to copy picture designs presented on test cards.                                                                                   | Visuo-spatial problem solving, visual perception and organization                                                                       |
| Coding-WISC <sup>b</sup> -III                  | The child has to substitute specific symbols for numbers presented in boxes, and complete as many items as possible in 2 minutes.                                                                                             | Visual-motor processing speed and coordination, short term memory, visual perception, visual scanning, cognitive flexibility, attention |

<sup>a</sup> Kaufman assessment battery for children-2<sup>nd</sup> edition

<sup>b</sup> Wechsler Intelligence Scale for Children-3<sup>rd</sup> edition

Type of file: table

Label: table 2

Filename: 37946 ESM Table 2.doc

**Electronic Supporting Material – Veena et al.**

**ESM Table 2. Covariates/confounders among ODMs and controls in matched pairs. Values are mean (SD) unless otherwise stated**

| Covariates                                                 | ODM<br>(n=32)     | Controls<br>(n=32) | P <sup>b</sup> |
|------------------------------------------------------------|-------------------|--------------------|----------------|
| <b>Maternal factors in pregnancy</b>                       |                   |                    |                |
| Age (years)                                                | 28.7 (4.9)        | 24.3 (4.3)         | 0.0003         |
| Parity 2+ (No (%))                                         | 6 (18.8)          | 8 (25.0)           | 0.5            |
| Body mass index (kg/m <sup>2</sup> ) <sup>a</sup>          | 27.1 (25.0, 29.1) | 24.5 (20.6, 28.3)  | 0.02           |
| <b>Pregnancy Complications (No (%))</b>                    |                   |                    |                |
| Premature labour                                           | 0 (0)             | 2 (6.3)            |                |
| Urinary tract infection                                    | 0 (0)             | 1 (3.1)            |                |
| <b>Infant factors at birth</b>                             |                   |                    |                |
| Gestational age (weeks)                                    | 39.3 (1.2)        | 39.5 (1.5)         | 0.5            |
| <b>Mode of delivery (No (%))</b>                           |                   |                    |                |
| Normal (Vaginal)                                           | 20 (62.5)         | 26 (81.3)          |                |
| Instrumental (Forceps or Ventouse)                         | 1 (3.1)           | 1 (3.1)            | 0.2            |
| Emergency caesarean section                                | 8 (25.0)          | 5 (15.6)           |                |
| Elective caesarean section                                 | 3 (9.4)           | 0 (0)              |                |
| Apgar score at 1 minute (score)                            | 8.7 (0.9)         | 8.7 (0.7)          | 0.9            |
| Apgar score at 5 minute (score)                            | 9.7 (0.7)         | 9.9 (0.3)          | 0.3            |
| Birthweight (kg)                                           | 3.270 (0.459)     | 2.907 (0.525)      | 0.005          |
| Head circumference (cm)                                    | 34.3 (1.2)        | 33.9 (1.6)         | 0.2            |
| <b>Children's factors at the time of cognitive testing</b> |                   |                    |                |
| <b>Gender- (No (%))</b>                                    |                   |                    |                |
| Male                                                       | 11 (34.4)         | 11 (34.4)          | 1.0            |
| Female                                                     | 21 (65.6)         | 21 (65.6)          |                |
| Age (years)                                                | 9.7 (0.3)         | 9.8 (0.3)          | 0.09           |
| Height (cm)                                                | 131.3 (6.2)       | 130.4 (5.3)        | 0.5            |
| Body mass index (kg/m <sup>2</sup> )                       | 15.9 (1.8)        | 14.5 (1.6)         | 0.002          |
| <b>Parents socio-economic status</b>                       |                   |                    |                |
| Standard of living index (score)                           | 37.4 (7.8)        | 37.5 (7.6)         | 0.97           |
| <b>Maternal education (No (%))</b>                         |                   |                    |                |
| <10 completed years                                        | 3 (9.4)           | 12 (37.5)          |                |
| -10 completed years                                        | 10 (31.2)         | 8 (25.0)           | 0.03           |
| >10 completed years                                        | 19 (59.4)         | 12 (37.5)          |                |
| <b>Paternal education (No (%))</b>                         |                   |                    |                |
| <10 completed years                                        | 7 (21.9)          | 8 (25.0)           |                |
| -10 completed years                                        | 20 (62.5)         | 14 (43.8)          | 0.2            |
| >10 completed years                                        | 5 (15.6)          | 10 (31.2)          |                |
| Residence: Rural (No (%))                                  | 5 (15.6)          | 5 (15.6)           | 1.0            |
| : Urban (No (%))                                           | 27 (84.4)         | 27 (84.4)          |                |
| <b>Cognitive tests</b>                                     |                   |                    |                |
| Atlantis                                                   | 75.9 (16.2)       | 69.5 (16.2)        | 0.1            |
| Word order                                                 | 17.0 (2.7)        | 16.8 (2.4)         | 0.8            |
| Pattern reasoning <sup>a</sup>                             | 12.5 (9.0, 16.0)  | 12.0 (9.0, 17.0)   | 0.1            |
| Verbal fluency-animals                                     | 13.1 (3.0)        | 12.0 (2.7)         | 0.07           |
| Verbal fluency-names                                       | 18.2 (5.2)        | 15.6 (4.9)         | 0.03           |
| Koh's block design <sup>a</sup>                            | 85.3 (68.1, 97.3) | 76.9 (63.4, 87.4)  | 0.4            |
| Coding-WISC-III                                            | 36.8 (8.0)        | 34.7 (10.2)        | 0.3            |

<sup>a</sup> Transformed variable; values are median (Inter-quartile range). <sup>b</sup> P values are for the difference between ODMs and controls derived using *t*-tests or Chi<sup>2</sup> tests.
